# Supplementary material
Source: PubMed Central journal article supplement (PMC7612680)

# Source data for ED Fig 4

ED Fig 4a, pH 6 + 4c, M1

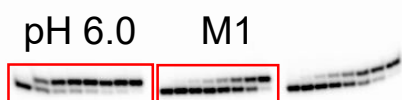

20% dPAGE, 20x30 cm, 35W, 2:30 h

ED Fig 4c

ED Fig 4a, pH 7.5

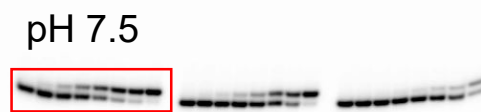

20% dPAGE, 20x30 cm, 35W, 2:30 h

ED Fig 4c

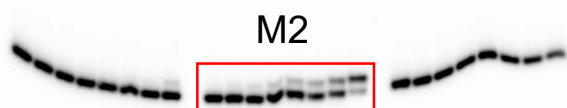

20% dPAGE, 20x30 cm, 35W, 2:30 h

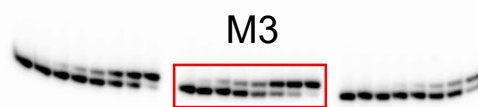

20% dPAGE, 20x30 cm, 35W, 2:30 h

# Source data for ED Fig 4

ED Fig 4c

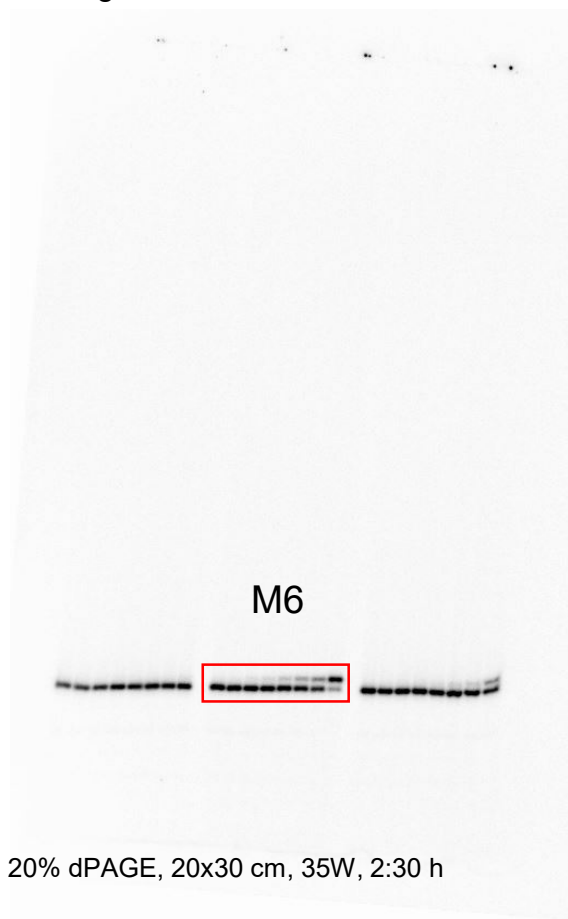

ED Fig 4c

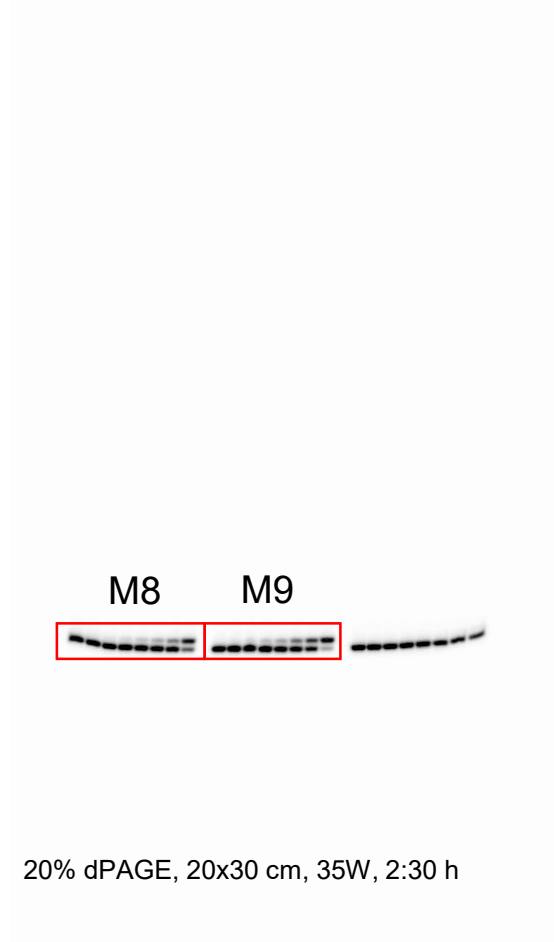

Supplement: EMS140816-supplement-Gelimages_Extended_Data_Fig_4.pdf [file EMS140816-supplement-Gelimages_Extended_Data_Fig_4.pdf]
