# Supplementary material
Source: PubMed Central journal article supplement (PMC7612680)
Supplement: EMS140816-supplement-Gelimages_Fig_4.pdf [file EMS140816-supplement-Gelimages_Fig_4.pdf]

## Source data for Fig 4c

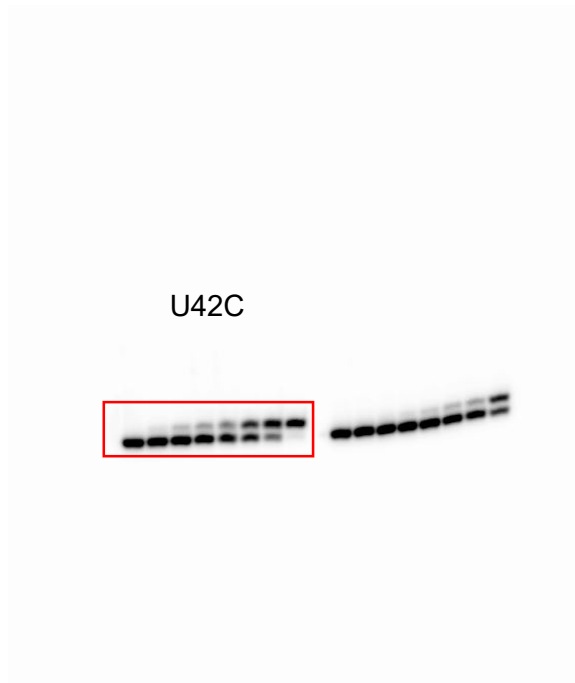

20% dPAGE, 20x30 cm, 35W, 2:30 h

## Source data for Fig 4e

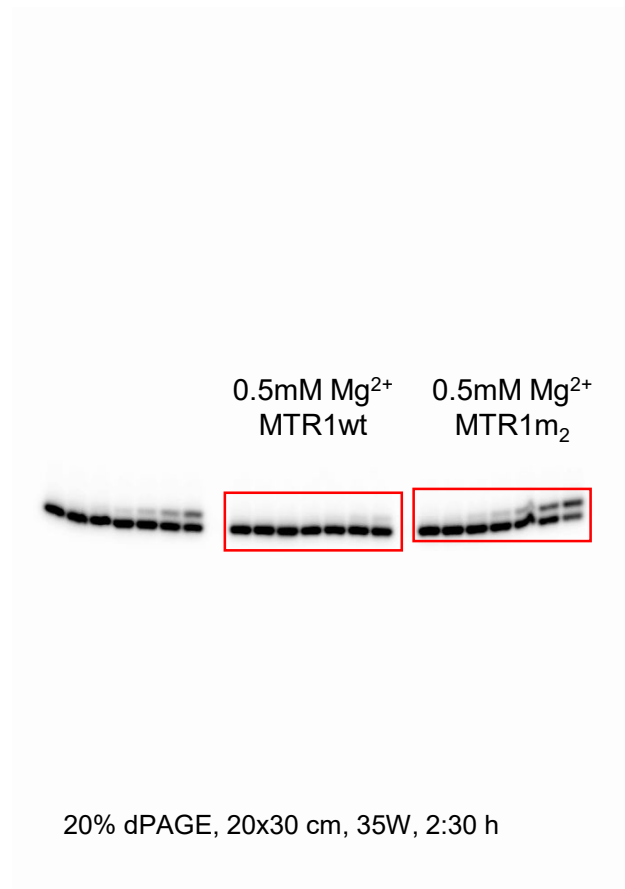

20% dPAGE, 20x30 cm, 35W, 2:30 h

## Source data for Fig 4e

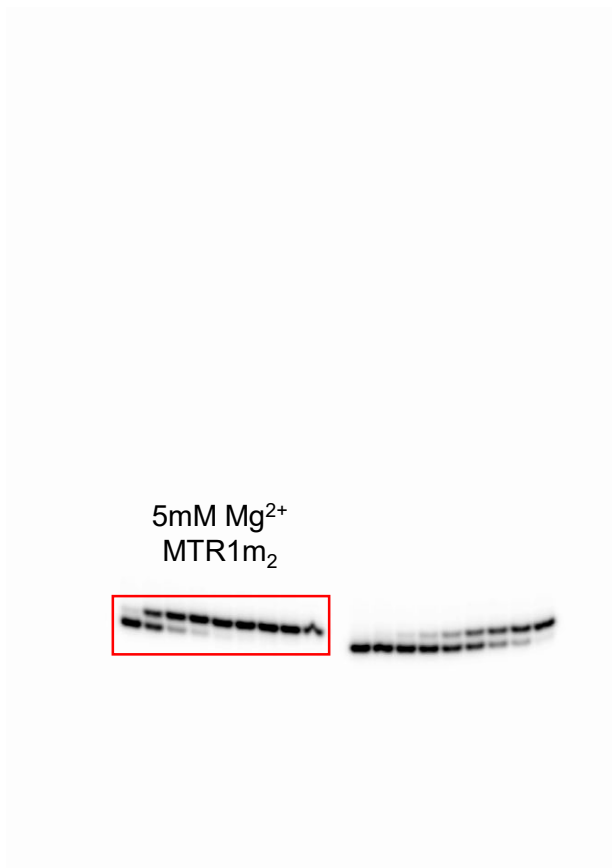

20% dPAGE, 20x30 cm, 35W, 2:30 h

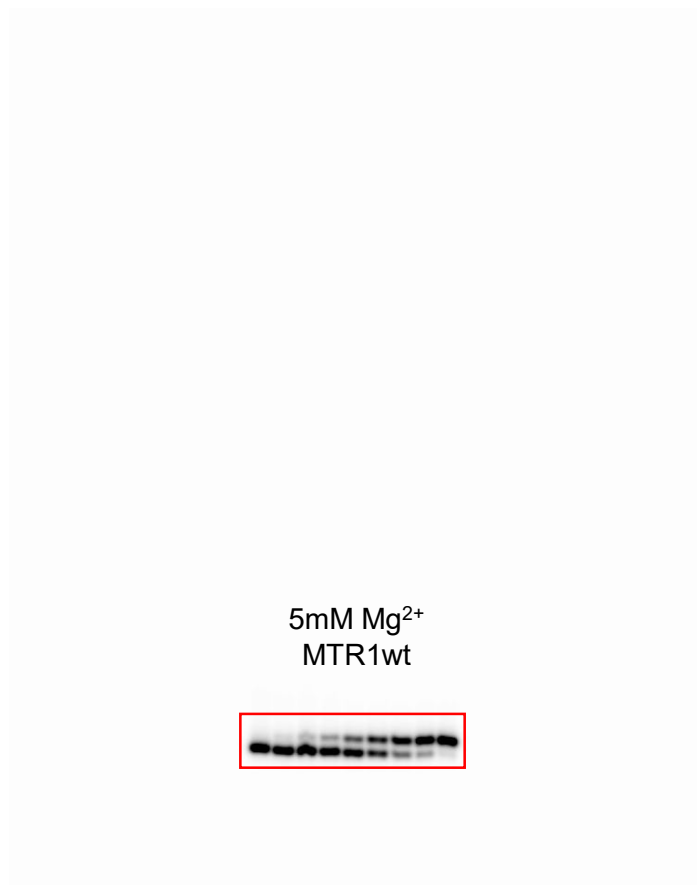

20% dPAGE, 20x30 cm, 35W, 2:30 h
