# Supplementary material
Source: PubMed Central journal article supplement (PMC7612680)
Supplement: EMS140816-supplement-Supplementary_Information.pdf [file EMS140816-supplement-Supplementary_Information.pdf]

**Supplementary Table 1 | Data collection and refinement statistics**

|                                           | MTR1-m <sup>1</sup> A                      | MTR1-bn <sup>1</sup> A            | MTR1-ab <sup>1</sup> A        | MTR1-m <sup>1</sup> A;<br>no Mg <sup>2+</sup> | MTR1-m <sup>1</sup> A;<br>2'-SeMeU | MTR1-m <sup>1</sup> A;<br>TI <sup>+</sup> |
|-------------------------------------------|--------------------------------------------|-----------------------------------|-------------------------------|-----------------------------------------------|------------------------------------|-------------------------------------------|
|                                           | (Crystal I)                                | (Crystal II)                      | (Crystal III)                 | (Crystal IV)                                  | (Crystal V)                        | (Crystal VI)                              |
| PDB code                                  | 7Q7X                                       | 7Q7Y                              | 7Q7Z                          | 7Q80                                          | 7Q81                               | 7Q82                                      |
| <b>Data collection</b>                    |                                            |                                   |                               |                                               |                                    |                                           |
| Space group                               | P 4 <sub>1</sub> 2 <sub>1</sub> 2          | P 4 <sub>1</sub> 2 <sub>1</sub> 2 | P 4 <sub>1</sub> 2 2          | P 4 <sub>1</sub> 2 2                          | P 4 <sub>1</sub> 2 <sub>1</sub> 2  | P 4 <sub>1</sub> 2 <sub>1</sub> 2         |
| Cell dimensions                           |                                            |                                   |                               |                                               |                                    |                                           |
| a, b, c (Å)                               | 71.0 71.0 82.8                             | 71.3 71.3 83.1                    | 117.9 117.9<br>83.3           | 120.9 120.9<br>82.2                           | 71.1 71.1<br>83.6                  | 72.0 72.0<br>84.5                         |
| α, β, γ (°)                               | 90 90 90                                   | 90 90 90                          | 90 90 90                      | 90 90 90                                      | 90 90 90                           | 90 90 90                                  |
| Resolution (Å)                            | 42.94 - 2.80<br>(2.90 - 2.80) <sup>1</sup> | 43.09-2.90<br>(3.08-2.90)         | 44.54 - 3.26<br>(3.38 - 3.26) | 45.17 - 3.15<br>(3.26 - 3.15)                 | 43.07 - 2.85<br>(2.95 - 2.85)      | 43.59 - 2.95<br>(3.06 - 2.95)             |
| R <sub>merge</sub>                        | 0.11 (>1.0)                                | 0.14 (>1.0)                       | 0.14 (>1.0)                   | 0.12 (>1.0)                                   | 0.07 (>1.0)                        | 0.10 (>1.0)                               |
| I/σI                                      | 18.74 (1.13)                               | 11.4 (1.20)                       | 11.92 (0.60)                  | 13.52 (0.56)                                  | 27.07 (1.38)                       | 18.01 (0.81)                              |
| Completeness (%)                          | 99.9 (99.8)                                | 99.9 (100)                        | 99.71 (98.83)                 | 99.1 (91.8)                                   | 99.9 (99.6)                        | 99.8 (100)                                |
| Redundancy                                | 24.8 (25.5)                                | 11.0 (11.4)                       | 15.4 (15.7)                   | 25.3 (23.1)                                   | 24.5 (25.7)                        | 24.9 (26.7)                               |
| CC1/2 (%)                                 | 99.6 (66.4)                                | 99.5 (56.1)                       | 99.9 (23.6)                   | 99.4 (25.8)                                   | 99.9 (69.3)                        | 99.9 (36.6)                               |
| Unique reflections                        | 5592 (533)                                 | 5134 (799)                        | 9584 (937)                    | 11036 (1054)                                  | 5365 (515)                         | 5037 (487)                                |
| Wilson B-factor (Å <sup>2</sup> )         | 90.4                                       | 111.1                             | 162.3                         | 138.3                                         | 122.5                              | 145.5                                     |
| Wavelength (Å)                            | 0.9198                                     | 0.9716                            | 1.0332                        | 1.0332                                        | 0.9786                             | 0.9751                                    |
| No. mol/AU                                | 1                                          | 1                                 | 2                             | 2                                             | 1                                  | 1                                         |
| <b>Refinement</b>                         |                                            |                                   |                               |                                               |                                    |                                           |
| Resolution                                |                                            |                                   |                               |                                               |                                    |                                           |
| No. reflections                           | 5587 (531)                                 | 5091 (492)                        | 9568 (928)                    | 10973 (993)                                   | 5363 (515)                         | 5037 (487)                                |
| R <sub>work</sub> / R <sub>free</sub> (%) | 21.3/25.5                                  | 19.8/24.4                         | 21.0/26.4                     | 17.6/20.3                                     | 18.8/21.4                          | 20.9/22.5                                 |
| No. of non-H atoms                        | 1340                                       | 1346                              | 2671                          | 2647                                          | 1347                               | 1334                                      |
| Macromolecules                            | 1312                                       | 1289                              | 2578                          | 2624                                          | 1313                               | 1312                                      |
| Ligands/ions                              | 28                                         | 57                                | 93                            | 23                                            | 34                                 | 22                                        |
| Average B-factors (Å <sup>2</sup> )       | 104.4                                      | 98.4                              | 166.2                         | 151.9                                         | 127.1                              | 123.9                                     |
| Macromolecules (Å <sup>2</sup> )          | 121.3                                      | 106.9                             | 186.4                         | 189.5                                         | 125.1                              | 114.7                                     |
| Ligands/ions (Å <sup>2</sup> )            | 87.5                                       | 89.8                              | 146.0                         | 114.4                                         | 129.0                              | 133.2                                     |
| r.m.s deviations                          |                                            |                                   |                               |                                               |                                    |                                           |
| Bond lengths (Å)                          | 0.001                                      | 0.002                             | 0.001                         | 0.001                                         | 0.001                              | 0.001                                     |
| Bond angles (°)                           | 0.20                                       | 0.41                              | 0.23                          | 0.27                                          | 0.29                               | 0.31                                      |
| Coord. Precis. <sup>2</sup> (Å)           | 0.33                                       | 0.34                              | 0.46                          | 0.37                                          | 0.16                               | 0.37                                      |

<sup>1</sup> Statistics for the highest-resolution shell are shown in parentheses. <sup>2</sup> Calculated by Maximum-Likelihood Estimation.

## Supplementary Table 2 | RNAs used in this study

### RNAs prepared by solid-phase synthesis

| description                 | 5'-sequence-3'                                        | Mass calculated | Mass found |
|-----------------------------|-------------------------------------------------------|-----------------|------------|
| R1 (unmodified substrate)   | CCACUGAGAGCUUC                                        | 4403.62         | 4403.63    |
| m1A R1 (methylated product) | CCACUG <sup>m</sup> AGAGCUUC                          | 4418.65         | 4418.65    |
| R1 with SeMeU12             | CCACUGAGAGC <sup>U</sup> Se <sup>m</sup> UC           | 4481.56         | 4481.57    |
| MTR1 5' fragment (R2)       | GGAAGCUCUGACCGACCCCCAGCC                              | 7621.13         | 7621.14    |
| MTR1 3' fragment (R3)       | GCUGGGACAACUAGACAUACAGUG                              | 7735.10         | 7735.13    |
| MTR1 5' fragment C12U       | GGAAGCUCUGA <sup>U</sup> CGACCCCCAGCC                 | 7622.08         | 7622.11    |
| MTR1 3' fragment U42C       | GCUGGGACAACUAGACA <sup>C</sup> ACAGUG                 | 7734.12         | 7734.17    |
| MTR1 5' fragment m5C12      | GGAAGCUCUGA <sup>m</sup> 5 <sup>C</sup> CGACCCCCAGCC  | 7635.11         | 7635.14    |
| MTR1 5' fragment m4C12      | GGAAGCUCUGA <sup>m</sup> 4 <sup>C</sup> CGACCCCCAGCC  | 7635.11         | 7635.14    |
| MTR1 5' fragment dC12       | GGAAGCUCUGA <sup>d</sup> C <sup>C</sup> CGACCCCCAGCC  | 7605.10         | 7605.13    |
| MTR1 3' fragment dU42       | GCUGGGACAACUAGACA <sup>d</sup> UACAGUG                | 7719.11         | 7719.13    |
| MTR1 5' fragment Cf12       | GGAAGCUCUGA <sup>C</sup> f <sup>C</sup> CGACCCCCAGCC  | 7623.09         | 7623.13    |
| MTR1 3' fragment Uf42       | GCUGGGACAACUAGACA <sup>U</sup> f <sup>f</sup> ACAGUG  | 7737.10         | 7737.11    |
| MTR1 5' fragment Cm12       | GGAAGCUCUGA <sup>C</sup> m <sup>C</sup> CGACCCCCAGCC  | 7635.11         | 7635.17    |
| MTR1 3' fragment Um42       | GCUGGGACAACUAGACA <sup>U</sup> m <sup>m</sup> ACAGUG  | 7749.12         | 7749.13    |
| MTR1 3' fragment USem42     | GCUGGGACAACUAGACA <sup>U</sup> Se <sup>m</sup> ACAGUG | 7813.04         | 7816.09    |
| MTR1 3' fragment Am41       | GCUGGGACAACUAGACA <sup>A</sup> m <sup>m</sup> UACAGUG | 7749.12         | 7749.13    |

### Ribozymes prepared by in vitro transcription

| description             | 5'-sequence-3' (binding arms underlined)                                |
|-------------------------|-------------------------------------------------------------------------|
| wt MTR1 ribozyme        | <u>GGAAGCUCUGACCGACCCCCGAGUUCGCUCGGGGACAACUAGACAUACAGUGG</u>            |
| M1 C17U                 | <u>GGAAGCUCUGACCGACU</u> CCCCGAGUUCGCUCGGGGACAACUAGACAUACAGUGG          |
| M2 A15G                 | <u>GGAAGCUCUGACCGG</u> CCCCCGAGUUCGCUCGGGGACAACUAGACAUACAGUGG           |
| M3 ΔC17A31              | <u>GGAAGCUCUGACCGAC</u> -CCCCGAGUUCGCUCGGGG-CAACUAGACAUACAGUGG          |
| M4 A15U+C16G+C17U       | <u>GGAAGCUCUGACCGUGU</u> CCCCGAGUUCGCUCGGGGACAACUAGACAUACAGUGG          |
| M5 A15G+ C16U+C32U+A33G | <u>GGAAGCUCUGACCGGU</u> CCCCCGAGUUCGCUCGGGGGAUGACUAGACAUACAGUGG         |
| M6 G14A+C35U            | <u>GGAAGCUCUGACC</u> AACCCCCGAGUUCGCUCGGGGACA <u>AU</u> UAGACAUACAGUGG  |
| M7 C13U+G38A            | <u>GGAAGCUCUGACU</u> GACCCCCCGAGUUCGCUCGGGGACAACUA <u>AA</u> CAUACAGUGG |
| M8 U9C                  | <u>GGAAGCUC</u> CGACCGACUCCCCGAGUUCGCUCGGGGACAACUAGACAUACAGUGG          |
| M9 U42C                 | <u>GGAAGCUCUGACCGACCCCCGAGUUCGCUCGGGGACAACUAGACA</u> <u>C</u> ACAGUGG   |

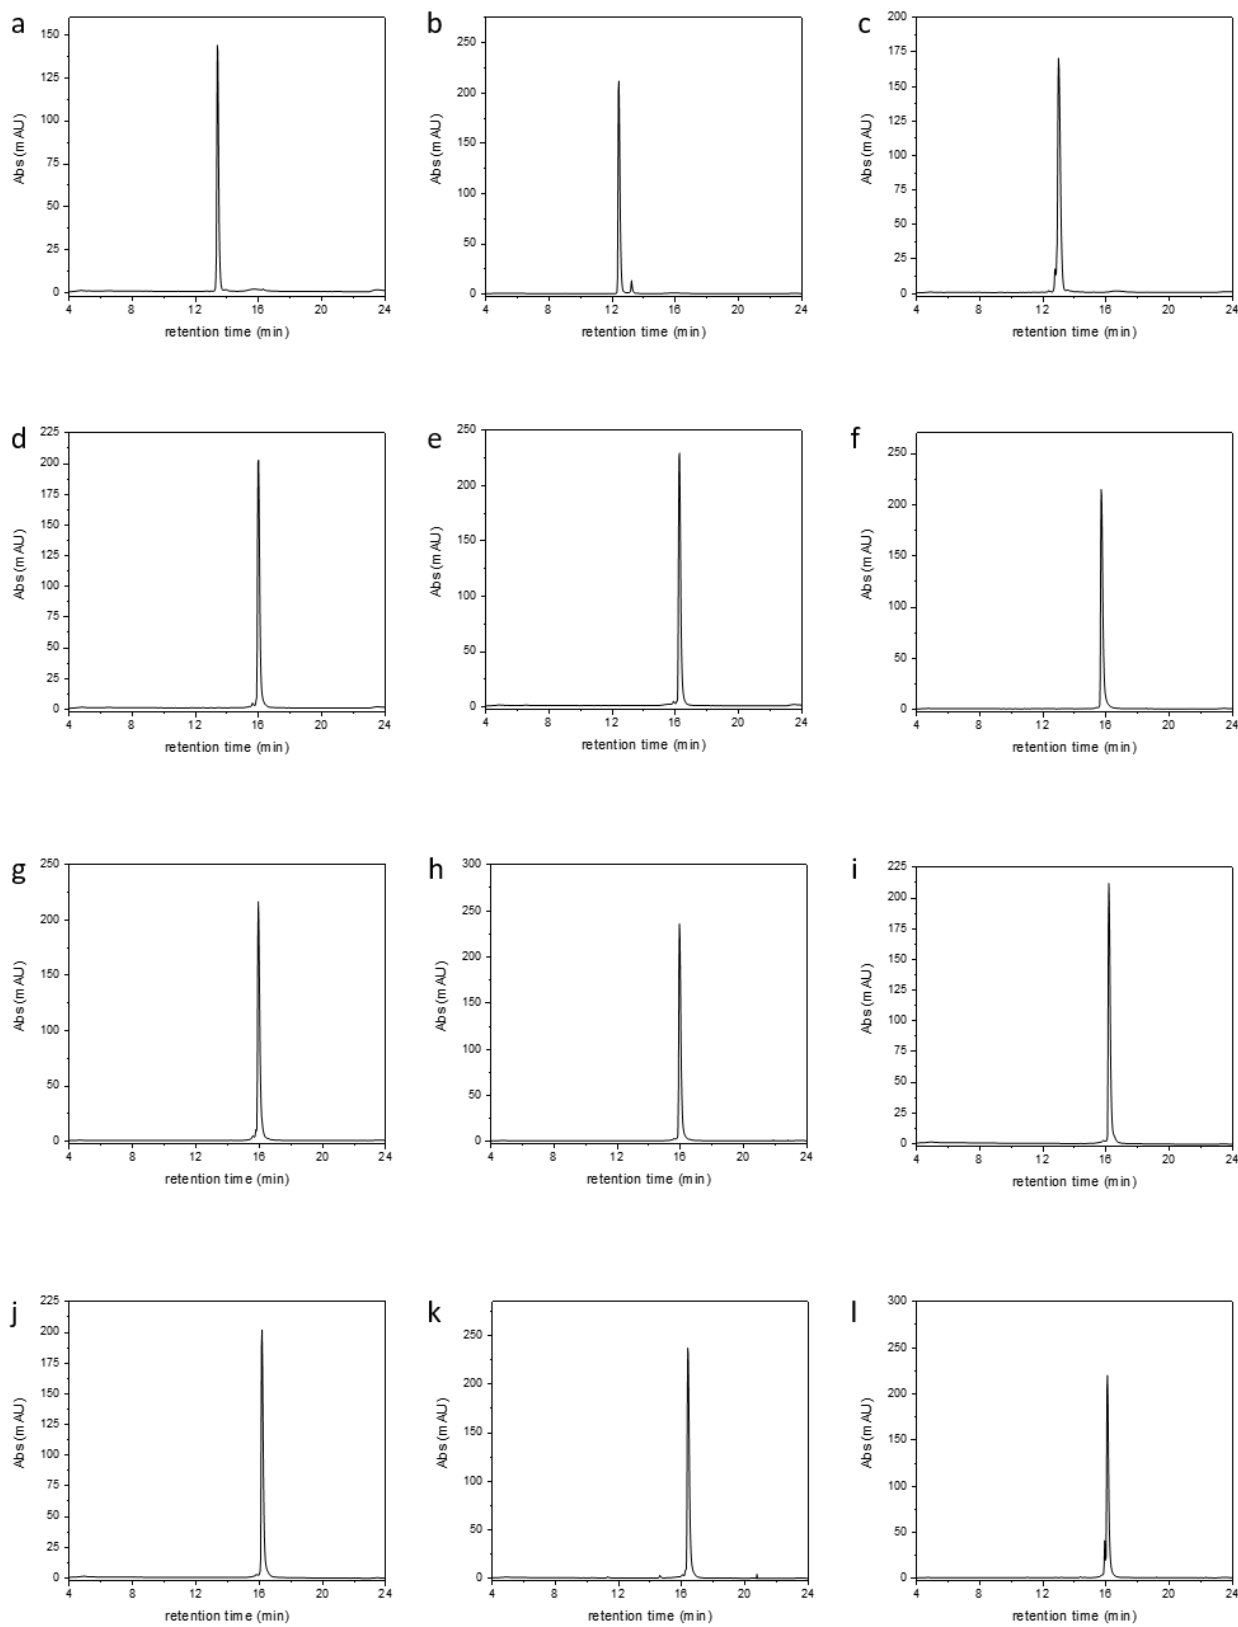

(Supplementary Figure 1. Continued on next page)

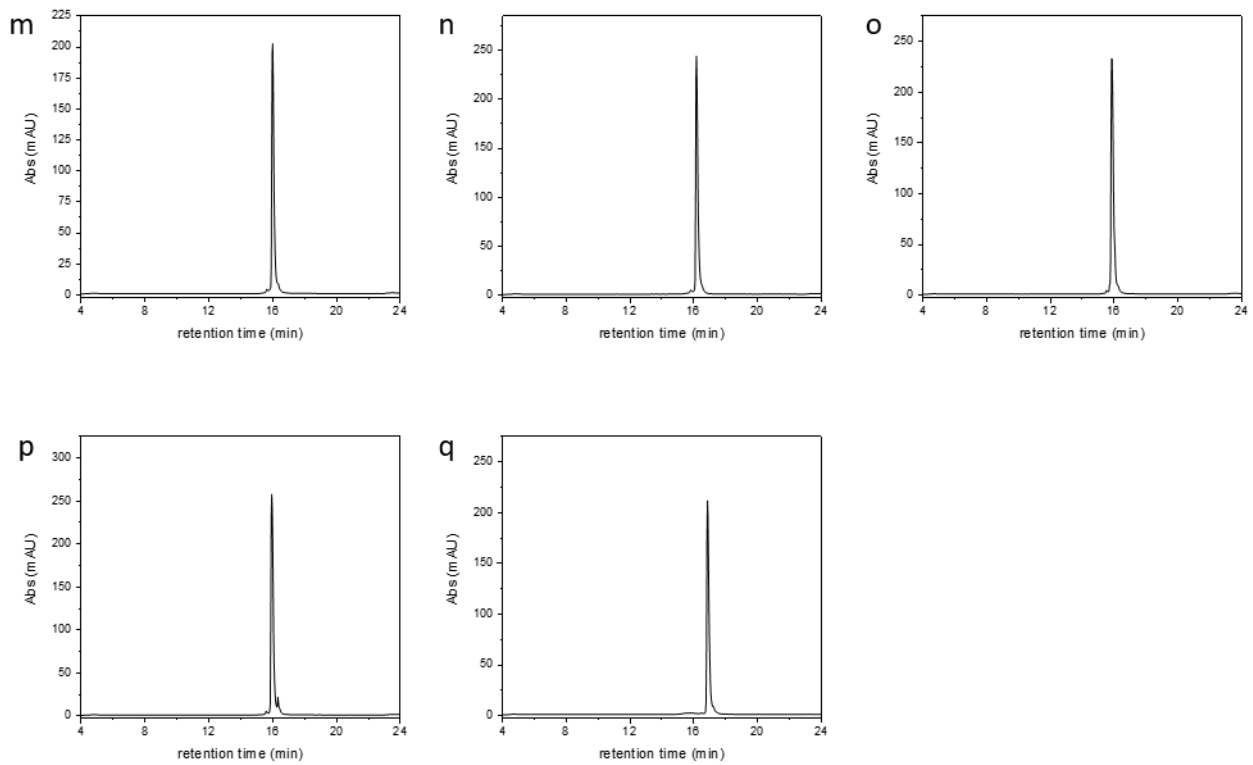

**Supplementary Figure 1.** Anion exchange HPLC chromatograms to confirm purity of RNA oligonucleotides prepared by solid-phase synthesis. (a) R1, (b) m<sup>1</sup>A R1, (c) R1\_USem12 (USem = 2'-SeMe-U), (d) R2, (e) R3, (f) R2\_C12U, (g) R3\_U42C, (h) R3\_dU42, (i) R2\_dC12, (j) R2\_Cm12, (k) R3\_Um42, (l) R3\_USem42, (m) R2\_Cf12, (n) R3\_Uf42, (o) R2\_m<sup>5</sup>C12, (p) R2\_m<sup>4</sup>C12, (q) R3\_Am43. Dionex DNAPAc PA200, 2x250 mm, 60°C, monitored at 260 nm.
