# Supplementary material
Source: PubMed Central journal article supplement (PMC7612680)

# Source data for ED Fig 5

ED Fig 5 d,e pH 6.0

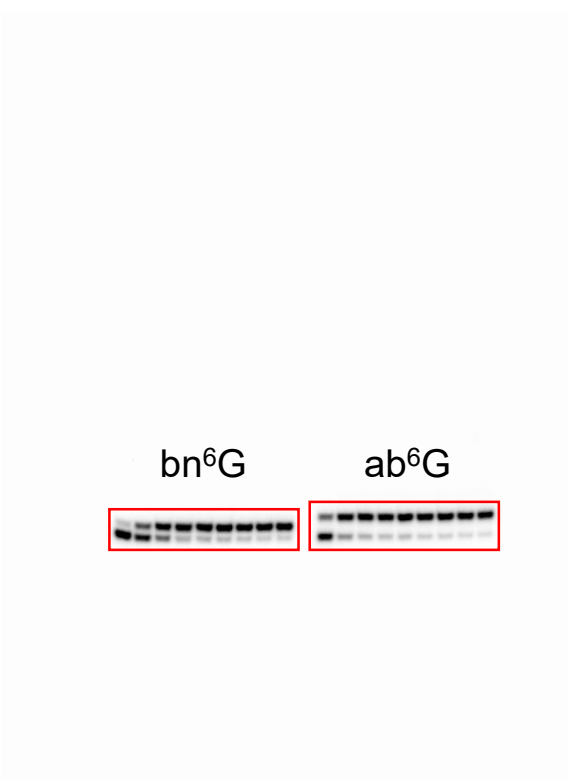

20% dPAGE, 20x30 cm, 35W, 1:20 h

ED Fig 5 d,e pH 7.5

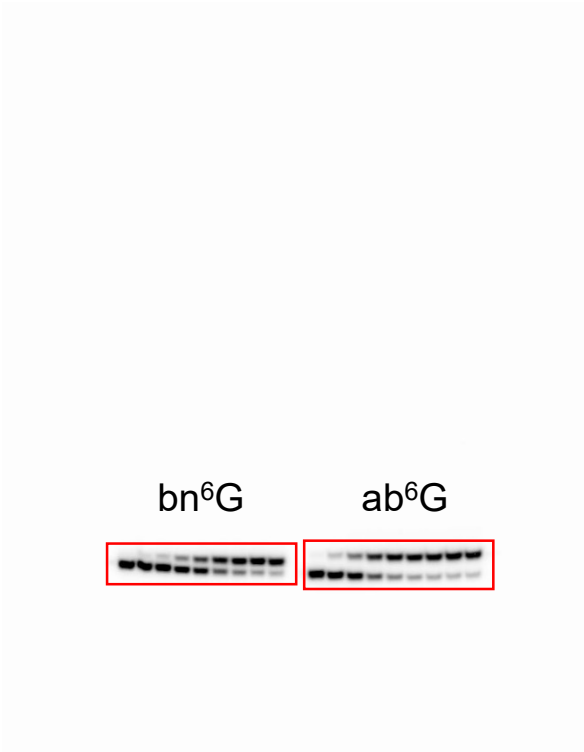

20% dPAGE, 20x30 cm, 35W, 1:20 h

Supplement: EMS140816-supplement-Gelimages_Extended_Data_Fig_5.pdf [file EMS140816-supplement-Gelimages_Extended_Data_Fig_5.pdf]

## Source data for Fig 3b

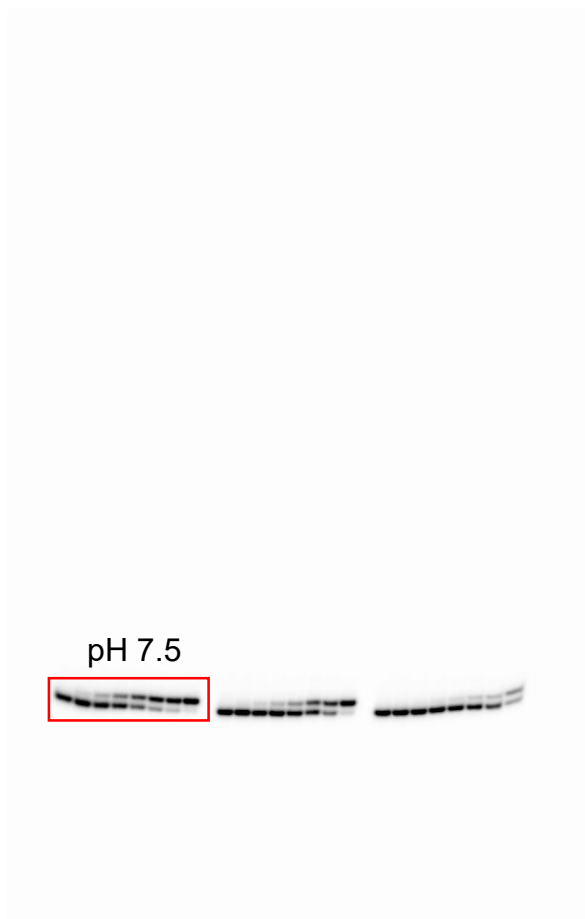

20% dPAGE, 20x30 cm, 35W, 2:30 h

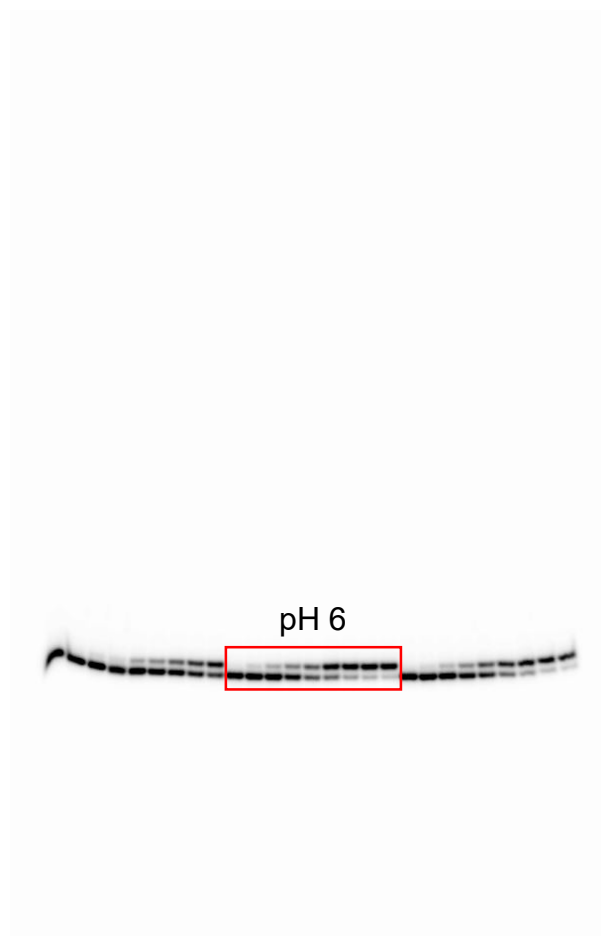

20% dPAGE, 20x30 cm, 35W, 2:30 h

Supplement: EMS140816-supplement-Gelimages_Fig_3.pdf [file EMS140816-supplement-Gelimages_Fig_3.pdf]
